# Supplementary material for: Comparison of two different host plant genera responding to grapevine leafroll-associated virus 3 infection
Source: PubMed Central journal article supplement (PMC7244584; doi:10.1038/s41598-020-64972-8), 2020-05-22
Supplement: 41598_2020_64972_MOESM1_ESM.pdf [file 41598_2020_64972_MOESM1_ESM.pdf]

## **Comparison of two different host plant genera responding to grapevine leafroll-associated virus 3 infection**

Cecilia A. Prator<sup>a</sup>, Kar Mun Chooi<sup>b</sup>, Dan Jones<sup>b</sup>, Marcus W. Davy<sup>c</sup>, Robin MacDiarmid<sup>b</sup>,  
Rodrigo P.P. Almeida<sup>a\*</sup>

<sup>a</sup>Department of Environmental Science, Policy, and Management, University of  
California, Berkeley, CA 94720, USA

<sup>b</sup>The New Zealand Institute for Plant and Food Research Limited, Auckland, New Zealand

<sup>c</sup>The New Zealand Institute for Plant and Food Research Limited, Te Puke, New Zealand

#Address correspondence to Rodrigo P.P. Almeida, [rodrigoalmeida@berkeley.edu](mailto:rodrigoalmeida@berkeley.edu)

## **SUPPLEMENTARY FIGURE LEGENDS**

**Supplementary Figure S1.** RT-qPCR validation of differentially expressed genes. Log<sub>2</sub> fold expression values of (a) seven *Vitis vinifera* and (b) four *Nicotiana benthamiana* RNA-seq-selected genes.

**Supplementary Table S1.** Summary of differentially expressed genes

**Supplementary Table S2.** Summary of transcript accumulation

**Supplementary Table S3.** Summary of shared differentially expressed genes found in more than one expression category to be up, down, or stably expressed.

**Supplementary Table S4.** Real-time polymerase chain reaction primers and gene targets.

**Supplementary Table S5.** Summary of viruses and viroids present in plant samples.

Supplementary Figure S1

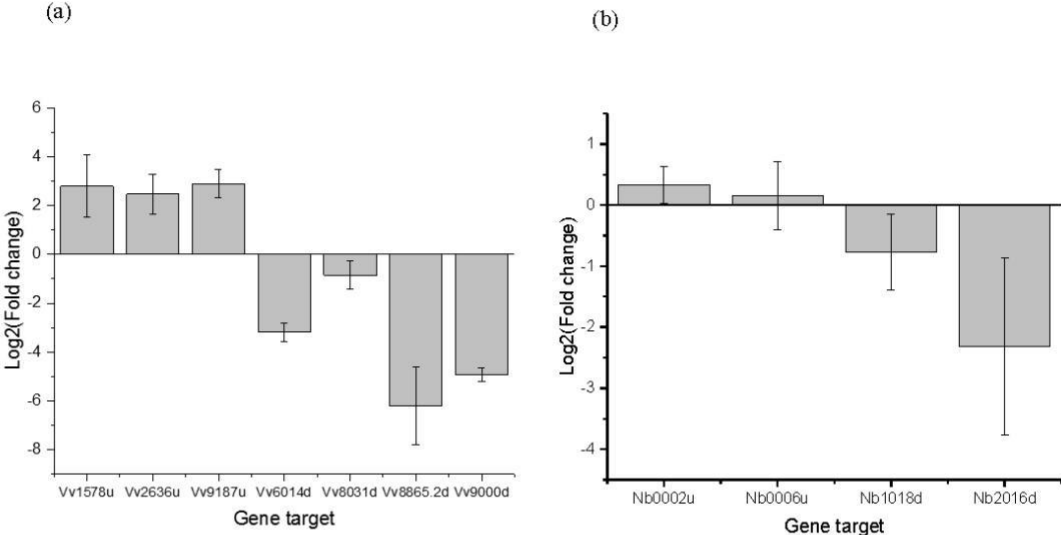

**Table S3. Summary of shared differentially expressed genes found in more than one expression category to be up, down, or stably expressed.**

**Upregulated**

---

Auxin transporter-like protein  
Cytochrome P450  
NAC domain-containing protein  
NAD(P)H-quinone oxidoreductase  
Protein NRT1/ PTR  
Subtilisin-like serine protease  
Sugar transporter protein  
Sulfate transporter  
U-box domain-containing protein  
Zinc finger protein

**Downregulated**

---

17.4 kDa class III heat shock protein  
Auxin efflux carrier component  
BAG family molecular chaperone  
regulator  
Chaperone protein  
Copper chaperone  
Cytochrome P450  
Ethylene-responsive transcription factor  
Heat shock cognate 70 kDa  
Homeobox-leucine zipper protein  
Peptidyl-prolyl cis-trans isomerase  
Protein NRT1/ PTR  
Sulfate transporter  
Zinc finger protein

**Stable**

---

60S ribosomal protein  
Eukaryotic translation initiation factor  
NAC domain-containing protein

**Table S4. Real-time polymerase chain reaction primers and gene targets.**

| Primer name                  | Nucleotide sequence (5'-3') | Transcript ID          | Description                                                    |
|------------------------------|-----------------------------|------------------------|----------------------------------------------------------------|
| <i>Vitis vinifera</i>        |                             |                        |                                                                |
| V8856.2F                     | AGCTGGTGGGTCATTCACTG        | GSVIVG01028856001      | heat shock protein 83                                          |
| V8856.2R                     | GTACTCCACCTGGTCGTCCT        |                        |                                                                |
| V8031F                       | ACGTAGACAAGAAGCTCGCTGA      | GSVIVG01038031001      | probable glutathione S-transferase parC                        |
| V8031R                       | AGAGAAGGGCACCAGAGCCA        |                        |                                                                |
| V2636F                       | CAATGTGATGGAGGCGAAGG        | GSVIVG01012636001      | thiamine thiazole synthase 2, chloroplastic                    |
| V2636R                       | GGTAGGACCCATCCTTGAG         |                        |                                                                |
| V1578F                       | AGCAGGGTATCCTCCACAAC        | GSVIVG01015780001      | cysteine-rich and transmembrane domain-containing protein A    |
| V1578R                       | CAAGGCAGCACAACATCCTT        |                        |                                                                |
| V9187F                       | TGGGATTGTCAACAGGCTCT        | GSVIVG01009187001      | VIN3-like protein 2 isoform X1                                 |
| V9187R                       | TCGTATCTGCATCCCTGCTT        |                        |                                                                |
| V6014F                       | TGCGGTTCAAGGCTGGTGTTT       | GSVIVG01026014001      | stromal 70 kDa heat shock-related protein, chloroplastic       |
| V6014R                       | TTGCCCATCTGCTGCCGTA         |                        |                                                                |
| V9000F                       | ACAACCCAAGGTGGTAGGTG        | GSVIVG01035900001      | chaperone protein ClpB4, mitochondrial                         |
| V9000R                       | AATAGTTGCCGCCCAAACCT        |                        |                                                                |
| V3149F*                      | ACTGCGTGTGGAGTAAGGA         | GSVIVG01023149001      | auxin response factor 1 isoform X1                             |
| V3149R*                      | CGACCGACTTGTTCTTGTTT        |                        |                                                                |
| V1341F*                      | TGGGAAGAGATCCAGGCAGCA       | GSVIVG01013410001      | Dolichyl-diphosphooligosaccharide--protein glycosyltransferase |
| V1341R*                      | GCTCCTCCACCTTGGGCAAT        |                        |                                                                |
| <i>Nicotiana benthamiana</i> |                             |                        |                                                                |
| B1018F                       | TTGCCTTTGGTGTCCCTTGGT       | Niben101Scf01182g01018 | Bidirectional sugar transporter N3                             |
| B1018R                       | TGAGGAGTGCAGTGTTGGTC        |                        |                                                                |
| B2016F                       | TGCGAGTCGAACGAACCTGCT       | Niben101Scf00739g02016 | Zinc finger Ran-binding domain-containing protein 2            |
| B2016R                       | CATACCACATCCAATTCTGCTGC     |                        |                                                                |
| B0002F                       | ACCACCAGGATTTAGGTTCTTTCCT   | Niben101Scf03366g00002 | NAC domain-containing protein 21/2                             |
| B0002R                       | GCCACCTCAGGAAGTTGCCA        |                        |                                                                |
| B0006F                       | TGTCTCTCAGGCTCACCACGA       | Niben101Scf03243g00006 | Tubulin alpha chain                                            |
| B0006R                       | TTCACGTCCTTGGGCACCAC        |                        |                                                                |
| B0009F*                      | GCTTGGAGAAGCGGTTTGGTC       | Niben101Scf07824g00009 | cellulose synthase 1                                           |
| B0009R*                      | GCCCACCGAAGCACCTCTTT        |                        |                                                                |
| B0007F*                      | TGTCCAGGAGAGATTCGGGTCTG     | Niben101Scf06579g00007 | Cytochrome b-c1 complex subunit 7                              |
| B0007R*                      | ACACGCACGCTCTGTGTCTC        |                        |                                                                |

\* genes showing stable expression by HTS used to normalize data
